1        **The female pheromone (Z)-4-undecenal**  
2        **mediates flight attraction and courtship in**  
3        ***Drosophila melanogaster***

---

4        Felipe Borrero-Echeverry 1,2, Marit Solum 1, Federica Trona 1, Erika A. Wallin 3, Marie  
5        Bengtsson 1, Peter Witzgall 1, Sebastien Lebreton 1,4

6        1 Chemical Ecology Unit, Department of Plant Protection Biology, Swedish University of  
7        Agricultural Sciences, 230 53 Alnarp, Sweden

8        2 Corporación Colombiana de Investigación Agropecuaria, Agrosavia, Mosquera,  
9        Colombia

10       3 Department of Chemical Engineering, Mid Sweden University, Holmgatan 10, 85170  
11       Sundsvall, Sweden

12       4 IRSEA, Research Institute for Semiochemistry and Applied Ethology, Quartier  
13       Salignan, 84400 Apt, France

14       Felipe Borrero-Echeverry - [fborrero@agrosavia.co](mailto:fborrero@agrosavia.co)

15       Marit Solum - [marit.solum@slu.se](mailto:marit.solum@slu.se)

16       Federica Trona - [federica.trona@scuole.provincia.tn.it](mailto:federica.trona@scuole.provincia.tn.it)

17       Erika A. Wallin - [erika.wallin@miun.se](mailto:erika.wallin@miun.se)

18       Marie Bengtsson - [marie.bengtsson@slu.se](mailto:marie.bengtsson@slu.se)

19       Peter Witzgall - [peter.witzgall@slu.se](mailto:peter.witzgall@slu.se)

20       Sebastien Lebreton - [s.lebreton@group-irsea.com](mailto:s.lebreton@group-irsea.com)

21

22       Author for correspondence: [peter.witzgall@slu.se](mailto:peter.witzgall@slu.se)

23       **Summary**

24       [27 words]

25       The female-produced, species-specific volatile pheromone of *D. melanogaster* attracts  
26       both sexes from a distance, alone and in concert with food odorants, and elicits  
27       courtship in experienced males.

## 28 **Abstract**

29 [249 words]

30 Specific mate communication and recognition underlies reproduction and hence  
31 speciation. Mate communication evolves during adaptation to ecological niches and  
32 makes use of social signals and habitat cues.

33 Our study provides new insights in *Drosophila melanogaster* premating olfactory  
34 communication, showing that female pheromone (*Z*)-4-undecenal (Z4-11Al) and male  
35 pheromone cVA interact with food odour in a sex-specific manner. Furthermore, Z4-  
36 11Al, which mediates upwind flight attraction in both sexes, also elicits courtship in  
37 experienced males.

38 Twin variants of the olfactory receptor Or69a are co-expressed in the same olfactory  
39 sensory neurons, and feed into the same glomerulus in the antennal lobe. Z4-11Al is  
40 perceived via Or69aB, while the food odorant (*R*)-linalool is a main ligand for the other  
41 variant, Or69aA. That Z4-11Al mediates courtship in experienced males, not (*R*)-  
42 linalool, is probably due to courtship learning. Behavioural discrimination is reflected by  
43 calcium imaging of the antennal lobe, showing distinct glomerular activation patterns by  
44 these two compounds.

45 Male sex pheromone cVA is known to affect male and female courtship at close range,  
46 but does not elicit upwind flight attraction as a single compound, in to contrast to Z4-  
47 11Al. A blend of cVA and the food odour vinegar attracted females, while a blend of  
48 female pheromone Z4-11Al and vinegar attracted males instead.

49 Sex-specific upwind flight attraction to blends of food volatiles and male and female  
50 pheromone, respectively, adds a new element to *Drosophila* olfactory premating  
51 communication and is an unambiguous paradigm for identifying the behaviourally active  
52 components, towards a more complete concept of food-pheromone odour objects.

## 53 **Keywords**

54 Specific Mate Recognition • Olfaction • Neuroethology • (*Z*)-11-octadecenyl acetate •  
55 cis-vaccenyl acetate • (*Z*)-4-undecenal

## 56 **Introduction**

57 Structure and function of the olfactory system have been studied in *Drosophila* like in  
58 no other insect, from peripheral odorant perception to central pathways generating

59 behavioural output. And, a particular emphasis of this work has been placed on  
60 courtship, inspired by a characteristic behavioural response (Depetris-Chauvin et al.  
61 2015, Kohl et al. 2015, Auer and Benton 2016, Grabe et al. 2016, Bates et al. 2020).  
62 The combined molecular and physiological know-how enables even investigations of the  
63 evolutionary development of olfactory channels in response to pheromones (Khallaf et  
64 al. 2020 a,b) and host odorants (Dekker et al. 2006, Markow 2019, Auer et al. 2020),  
65 across *Drosophila* phylogenies.

66 What is still unclear is whether olfactory tuning and response to pheromones and host  
67 or food odours evolve independently. And, although odorants enable evaluation and  
68 recognition of the emitter or source from a distance, little attention has been paid to  
69 the role of species-specific sex pheromones in distant mate recognition and flight  
70 attraction, prior to courtship enactment.

71 *Drosophila* cuticular hydrocarbon (CHC) profiles are sexually dimorphic, they vary and  
72 rapidly diverge between species and therefore contribute to sexual, reproductive  
73 isolation (Howard et al. 2003, Legendre et al. 2008, Alves et al. 2010, De Oliveira et al.  
74 2011, Davis et al. 2020). Naturally, this congruently applies to their volatile oxidation  
75 products, particularly monounsaturated aldehydes, which derive from diunsaturated  
76 CHCs.

77 A CHC produced by female flies, (*Z,Z*)-7,11-heptacosadiene (7,11-HD), has been shown  
78 to afford reproductive isolation between *D. melanogaster* and its sibling species *D.*  
79 *simulans*. It is perceived by gustatory receptors owing to its low volatility (Billeter et al.  
80 2009, Thistle et al. 2012, Toda et al. 2012, Billeter and Wolfner 2018, Seeholzer et al.  
81 2018, Sato and Yamamoto 2020). Oxidation of 7,11-HD gives rise to the volatile  
82 pheromone (*Z*)-4-undecenal (Z4-11Al) which is perceived by one of the two variants of  
83 the olfactory receptor DmelOr69a (Or69a) and elicits flight attraction in males and  
84 females (Lebreton et al. 2017). The Or69a gene encodes two or more proteins, in a  
85 range of *Drosophila* species (Robertson et al. 2003, Conceicao and Aguade 2008). In *D.*  
86 *melanogaster*, the two isoforms of Or69a, Or69aA and Or69aB, are tuned to food  
87 odorants, including (*R*)-linalool and to the female pheromone Z4-11Al, respectively.  
88 They are expressed in the same olfactory sensory neurons (OSNs), and afford  
89 combined input of sex and food stimuli (Lebreton et al. 2017).

90 In comparison, *cis*-vaccenyl acetate (cVA) is a pheromone produced by males that  
91 increases female receptivity and reduces male attraction to recently mated females  
92 (Bartelt et al. 1985, Ejima et al. 2007, Kurtovic et al. 2007, Keleman et al. 2012,  
93 Lebreton et al. 2014). However, cVA cannot account for specific mate communication  
94 since it is shared by many other *Drosophila* species (El-Sayed 2020). The processing of  
95 cVA stimuli in sexually dimorphic neural pathways has been mapped from antennal  
96 input to third-order neurons in the lateral horn, where gender-specific courtship  
97 behaviour is generated (Kohl et al. 2013, Clowney et al. 2015).

98 cVA activates the sexually dimorphic fruitless (*Fru*) circuitry that controls male  
99 courtship (Manoli et al. 2005, Stockinger et al. 2005, Billeter et al. 2006, Cachero et al.  
100 2010), whereas Z4-11Al is not part of this circuit. Since Z4-11Al is produced by  
101 females, we investigated its effect on flight attraction and courtship, which are  
102 successive steps in male reproductive behaviour. An upwind flight assay confirms that  
103 Z4-11Al elicits attraction in naive males (Lebreton et al. 2017), while it elicits courtship  
104 only in experienced, previously mated males.

105 Remarkably, males distinguished between Z4-11Al and the food odorant (*R*)-linalool,  
106 which did not elicit courtship. Both compounds are perceived via the two isoforms of  
107 Or69a, that are co-expressed in the same OSNs, while functional imaging of the  
108 antennal lobe (AL) showed nonetheless different activation patterns for Z4-11Al and  
109 (*R*)-linalool.

110 Food odours act as aphrodisiacs and promote courtship in *Drosophila* (Grosjean et al.  
111 2011, Gorter et al. 2016, Ando et al. 2020). Vinegar has traditionally been used as a  
112 source of food odorants in fruit fly research, and has a prominent synergistic effect on  
113 cVA perception and attraction (Lebreton et al. 2015, Das et al. 2017, Cazale-Debat et  
114 al. 2019). Vinegar headspace contains several active compounds (Becher et al. 2010)  
115 but greatly varies in composition between makes and types (Callejón et al. 2009,  
116 Chinnici et al. 2009). Over-ripe fermenting fruit, on the other hand, is a feeding,  
117 mating, and oviposition site for fruit flies. Yeasts growing on fruit release a very rich  
118 volatome, that accounts for strong fly attraction (Becher et al. 2012, Buser et al. 2014,  
119 Christiaens et al. 2014, Ljunggren et al. 2019).

120 We compared the effect of vinegar and yeast headspace on sex attraction to  
121 pheromone. Blends of vinegar odour and male or female pheromone produced sex-  
122 specific flight attraction of females and males, respectively. In comparison, both sexes  
123 respond to blends of yeast and cVA or Z4-11Al.

## 124 **Materials and methods**

### 125 **Insects and chemicals**

126 Flies were reared on a standard sugar-yeast-cornmeal diet at room temperature (19 to  
127 22°C) under a 16:8-h L:D photoperiod. Newly eclosing flies were anesthetized with CO<sub>2</sub>  
128 and sexed under a microscope. Virgin flies were identified by the presence of  
129 meconium, and were kept together with flies of the same sex. Mated males were kept  
130 together with females, and were separated 2 d before experiments. Flies were kept in  
131 30-mL Plexiglas vials with fresh food, and were six d old when used for experiments.

132 Isomeric purity of (*Z*)-4-undecenal (Z4-11Al) and (*E*)-4-undecenal (E4-11Al) was  
133 98.6% and 97.8%, respectively, according to gas chromatography coupled to mass

134 spectrometry (6890 GC and 5975 MS, Agilent Technologies, Santa Clara, CA, USA).  
135 Chemical purity of the synthetic aldehydes was >99.9%, and of the other test  
136 chemicals >97%. Heptane (redistilled; Merck, Darmstadt, Germany) was used as  
137 solvent.

### 138 **Functional imaging**

139 The head capsule was opened by incising the cuticle between the antennae and the  
140 eyes. With the brain immersed in Ringer's saline, the ALs were exposed by removing  
141 muscle tissue, glands and trachea. In vivo recordings of illuminated preparations were  
142 processed using custom software (Strutz et al. 2014).

143 We used a Till Photonic imaging system with an upright Olympus microscope (BX51WI)  
144 and a 20x Olympus objective (XLUM Plan FL 20x/0.95W). A Polychrome V provided light  
145 excitation (475 nm), which was then filtered (excitation: SP500, dichroic: DCLP490,  
146 emission LP515) and captured by a CCD camera (Sensicam QE, PCO AG) with  
147 symmetrical binning. For each measurement, a series of 300 frames was taken (1 Hz).  
148 Data were analyzed using IDL (Research Systems Inc., Boulder, CO, USA).

149 A 3-D map of the fruit fly AL (Grabe et al. 2015) served to link the active area to  
150 individual glomeruli. All experimental flies contained the calcium dependent fluorescent  
151 sensor G-CaMP 3.0 (Nakai et al. 2001) together with a promoter Gal4 insertion to direct  
152 expression of the calcium sensor to specific neuron populations. Stimulus-evoked  
153 fluorescence in these flies arises from the population of labeled neurons that are  
154 sensitive to the specific odour.

155 We tested the physiological responses in input neurons, i.e. the axonal terminals of  
156 OSNs in the AL. Mass labelling of olfactory sensory neurons (OSNs) was achieved using  
157 the transgenic line Orco-GAL4 that drives expression in at least 60% of all OSNs  
158 (Larsson et al. 2004). Additionally, for mass labelling of PNs, the transgenic line  
159 GH146-GAL4, expressing G-CaMP in 83 out of the 150 PNs in each AL (Vosshall and  
160 Stocker 2007) has been used. Fly lines were obtained from the Bloomington *Drosophila*  
161 Stock Center (Indiana University, Bloomington, IN, USA). Transgenic flies have been  
162 generated using standard procedures.

### 163 **Courtship assay**

164 Wild-type flies for courtship experiments were the *D. melanogaster* strains Dalby-HL  
165 (Ruebenbauer et al. 2008) and Canton-S, and and the sister species *D. simulans*.

166 Orco-Gal4/uas-Or69aRNAi flies, and the Orco-Gal4 and uas-Or69aRNAi (VDCR, Vienna)  
167 parental lines were used to confirm the effect of Z4-11Al on courtship behavior.

168 Canton-S served as comparison for knockouts of the same background. We resorted to  
169 the Orco-Gal4 line, since males of the Or69a-Gal4 line did not court. Because of the

170 broad expression of the Or69aRNAi, we cannot exclude that other Ors involved in  
171 courtship in experienced males are also affected.

172 Courtship experiments were done on a light box (37x28x2.5 cm; color temperature  
173  $5.000 \pm 5\%$  Kelvin; Kaiser Slimlite 2422, Kaiser Fototechnik GmbH & Co. KG, Buchen,  
174 Germany). The courtship arena consisted of three glass plates (17x13x0.5 cm) placed  
175 on top of each other. Twelve circular holes ( $\varnothing$  3 cm) were cut in the middle plate to  
176 form 12 circular single-pair mating chambers. All glassware was heated to 350°C for 8  
177 h before use. Tests were done between 2 and 5 h after onset of scotophase (16:8 L:D  
178 photoperiod). Target flies, unmated males or females, were anesthetized on ice and  
179 decapitated before experiments. Test flies were either mated or unmated males. A  
180 single target fly was added to each mating chamber, and 1  $\mu$ l heptane (control) or 1  $\mu$ l  
181 heptane containing 1 ng Z4-11Al was applied onto its abdomen. After solvent  
182 evaporation (2 min), a single live test fly was introduced into each mating chamber and  
183 observed during 20 min. Males were scored when showing vigorous courtship  
184 behaviour, including wing vibration, licking, and attempted copulation. Treatments ( $n =$   
185 80) and controls ( $n = 80$ ) were conducted simultaneously, and each fly was tested  
186 once.

### 187 **Food odour collection**

188 Brewer's yeast, *Saccharomyces cerevisiae* (strain S288C), was grown in minimal media  
189 (Merico et al. 2007) during 20 h in a shaking incubator at 25°C and 260 RPM. 50 mL  
190 yeast broth or white vine vinegar (7.1%, Zeta, Sweden) were filled into a wash bottle  
191 and charcoal filtered air was bubbled through the bottle at a rate of 200 mL/min.  
192 Headspace was trapped in 4x40-mm glass tubes holding 300 mg of Porapak Q 50/30  
193 (Waters Corporation, Milford, Ma, USA) during 2 h (Becher et al. 2012). These air filters  
194 were eluted with 1.2 mL redistilled ethanol (Labscan), the eluate was sprayed during 2  
195 h of wind tunnel experiments.

### 196 **Wind tunnel assay**

197 Upwind flight attraction was observed in a glass wind tunnel (30x30x100 cm). The wind  
198 tunnel was lit diffusely from above, at 13 lux, temperature ranged from 20°C to 24°C,  
199 relative humidity from 38% to 48% and charcoal filtered air (Camfil AB, Malmö,  
200 Sweden), at a velocity of 0.25 m/s, was produced by a fan (Fischbach GmbH,  
201 Neunkirchen, Germany). Yeast headspace and odour blends were delivered from the  
202 centre of the upwind end of the wind tunnel via a piezo-electric microsyringe (Becher et  
203 al. 2010).

204 Forty flies were flown individually to each treatment. Flies were scored when flying  
205 upwind over 80 cm in the wind tunnel centre, from the release cage towards the odour  
206 source. Unmated, fed, 3-d-old males and females were flown towards yeast and vinegar  
207 headspace alone and in blends with Z4-11Al sprayed at 10 ng/min (Lebreton et al.

208 2017) and 300 ng/min *cis*-vacceanyl acetate (cVA) (Lebreton et al. 2015). Isomeric  
209 purity of the synthetic compounds, according to gas chromatography, was 98.6% and  
210 97.3%, respectively.

## 211 **Statistical analysis**

212 Generalized linear models (GLM) with a Bernoulli binomial distribution were used to  
213 analyse wind tunnel data. Landing at source and sex were used as the target effects.  
214 *Post-hoc* Wald pairwise comparison tests were used to identify differences between  
215 treatments. Courtship assays were analysed using chi-squared tests to compare  
216 between treatments and their respective control. Statistical analysis was calculated with  
217 R (R Core Team 2013) and SPSS Version 22 (IBM Corp.).

## 218 **Results**

### 219 **Flight attraction to blends of pheromone and food odour**

220 The male-produced pheromone cVA (Bartelt et al. 1985) is a core paradigm for  
221 behavioural and neurophysiological studies in *Drosophila*. The volatile, female-produced  
222 and species-specific pheromone Z4-11Al has been discovered more recently (Lebreton  
223 et al. 2017). We therefore compared flight attraction to male pheromone cVA and  
224 female pheromone Z4-11Al, in *D. melanogaster* males and females. Pheromones were  
225 tested alone and in blends with odorants from vinegar and yeast, signalling food  
226 sources (Figure 1).

227 Male pheromone cVA alone attracted only few flies, while a blend of cVA and vinegar  
228 was highly attractive to females, not to males (Figure 1b). In comparison, both sexes  
229 responded to a blend of cVA and yeast headspace.

230 Female pheromone Z4-11Al alone attracted males and females. Blending vinegar with  
231 Z4-11Al reduced attraction in both sexes, but significantly more males than females  
232 responded. And, a blend of yeast headspace and Z4-11Al attracted as many flies as Z4-  
233 11Al alone (Figure 1c).

234 Yeast headspace by itself attracted more males and females than vinegar headspace  
235 (Figure 1a). Females attraction to yeast headspace (Figure 1a) and to the blends of  
236 yeast headspace and cVA and Z4-11Al, respectively, was not significantly different  
237 (Figures 1b,c).

238 Taken together, only few flies responded to the male pheromone cVA, while the female  
239 pheromone Z4-11Al strongly attracted both sexes. Blending vinegar with cVA and Z4-  
240 11Al, respectively, produced an inverse response pattern in male and female flies. Our



241 results show further that vinegar, a frequently used food odorant source for *Drosophila*,  
242 is an inferior attractant in comparison with yeast aroma (Figure 1).

### 243 **Male courtship in response to Z4-11Al**

244 Male-produced cVA mediates aggregation, suppresses male-to-male courtship, and  
245 males learn to avoid mated females tainted with cVA (Ejima et al. 2007, Kurtovic et al.  
246 2007, Keleman et al. 2012). Since female-produced Z4-11Al elicits male flight  
247 attraction (Figure 1c), we asked whether Z4-11Al also has an effect on courtship,  
248 following landing at females. Males were tested with decapitated target flies, laced with  
249 blank solvent or synthetic test chemicals.

250 Compared with solvent control, Z4-11Al elicited a significant response in experienced  
251 males that had mated earlier, and not in naive, unmated males. Males scored showed  
252 vigorous courtship including attempted copulation (Figure 2a). More experienced males  
253 courted decapitated females than males, plausibly because cVA, present on the cuticula  
254 of male flies, has an antagonistic effect on experienced males. That a few males  
255 nonetheless courted decapitated males further confirms a role of Z4-11Al in male  
256 courtship (Figure 2a). Tests with Canton-S test males corroborated results obtained  
257 with males of the Dalby strain (Figure 2b).

258 Importantly, males also courted decapitated *D. simulans* target females, laced with  
259 synthetic Z4-11Al (Figure 2b). This experiment rules out a contributing role of the  
260 cuticular hydrocarbon pheromone 7,11-HD, which is specific for *D. melanogaster* and  
261 not found in *D. simulans* females (Billeter et al. 2009), and underlines that Z4-11Al  
262 elicits male courtship, in the absence of 7,11-HD.

263 On the other hand, *D. simulans* males did not respond in a significant manner to Dalby  
264 females painted with Z4-11Al (Figure 2b). This was expected, since *D. simulans* males  
265 are not attracted to Z4-11Al (Lebreton et al. 2017) and since *D. simulans* females do  
266 not produce 7,11HD, which is the precursor for Z4-11Al (Billeter et al. 2009, Lebreton  
267 et al. 2017).

268 Moreover, we used a RNAi fly line to corroborate that Or69a encodes Z4-11Al-mediated  
269 courtship. Significantly fewer males responded when olfactory sensory neurons (OSNs)  
270 expressing Or69a were disrupted (Figure 2c).

271 Finally, we tested three non-pheromonal chemicals: E4-11Al, the geometric isomer of  
272 Z4-11Al, which is perceived via the Or69aB variant; (*R*)-linalool, a food compound,  
273 which is the main ligand of the other variant, Or69aA; and ethyl butyrate, which is a  
274 ligand for Or22a (DM2 glomerulus in the AL), for Or43b (VM2 glomerulus) and also for  
275 Or85a (DM5 glomerulus; see also Figure 3). None of these compounds elicited a  
276 significant courtship response in experienced males (Figure 2d).



## 277 **Activation of antennal lobe glomeruli in response to Z4-11Al**

278 The D glomerulus in the antennal lobe (AL) collects input from ab9A olfactory sensory  
279 neurons (OSNs) that co-express Or69aA and Or69aB, the two isoforms of Or69a  
280 (Couto et al. 2005). Single sensillum recordings (SSR) have further shown that the  
281 food odour (*R*)-linalool and female pheromone Z4-11Al are the respective key ligands  
282 for Or69aA and Or69aB (Lebreton et al. 2017).

283 We used calcium imaging of the AL to first confirm the role of the Or69a channel  
284 including the D glomerulus in the perception of Z4-11Al. Moreover, we compared the AL  
285 response to the key ligands (*R*)-linalool and Z4-11Al. Both compounds elicit upwind  
286 flight (Lebreton et al. 2017), but only Z4-11Al participates in male courtship, which  
287 goes to show that the flies discriminate between these two compounds (Figure 2).

288 In males and females, Z4-11Al activated the D glomerulus, as expected, but also DM2  
289 and VM2 (Figure 3a). These broadly-tuned glomeruli have also been shown to respond  
290 to a mix of cVA and vinegar (Lebreton et al. 2015). However, neither ab3A OSNs  
291 (expressing Or22a, connecting to DM2), nor ab8A (expressing Or43b, connecting to  
292 VM2; Grabe et al. 2015, Münch and Galizia 2016) responded to Z4-11Al, according to  
293 SSR (Lebreton et al. 2017). Simultaneous activation of DM2 and VM2 glomeruli by Z4-  
294 11Al might accordingly reflect interglomerular communication in the AL, via local  
295 neurons (Wilson 2013).

296 (*R*)-linalool, on the other hand, is also a ligand for ab7A OSNs expressing Or98a, which  
297 accounts for additional activation of the VM5v glomerulus (Couto et al. 2005, Münch  
298 and Galizia 2016). In comparison, activation of DM2 and VM2 glomeruli by (*R*)-linalool  
299 was much lower compared to Z4-11Al (Figure 3a).

300 Activation of the DM2 and VM2 glomeruli by Z4-11Al was substantiated by imaging  
301 Or22a-Gal4 males and Or43b-Gal4 males, respectively. Ethyl butyrate is a diagnostic  
302 stimulus for Or22a, Or43b and Or85a (DM2, VM2 and DM5 glomeruli) (Figure 3b; Grabe  
303 et al. 2015, Münch and Galizia 2016).

304 Imaging of the glomerular activation pattern of projection neurons (PNs), connecting  
305 the AL to the lateral horn (LH), where behavioural responses are generated,  
306 corroborated activity of Z4-11Al in the D and DM2 glomeruli (Figure 3c). A possible  
307 response of VM5v to linalool does not show, since GH146-Gal4 does not label this  
308 glomerulus (Grabe et al. 2015).

## 309 **Discussion**

310 Volatile chemicals that are cognate ligands for odorant receptors (ORs) are selectively  
311 perceived against noisy backgrounds and they capacitate behavioural decisions at a

312 distance, since they deliver reliable information about the source, including identity and  
313 physiological state of the emitter, in the case of pheromones.

314 The female pheromone Z4-11Al attracts naive males and females by flight (Figure 1).  
315 At close range, Z4-11Al also elicits courtship, but only in experienced, previously mated  
316 males (Figure 2). A response in naive males is not expected, since neurons mediating  
317 perception of Z4-11Al are not part of the sexually dimorphic fruitless circuitry that  
318 elicits innate male courtship (Manoli et al. 2005, Stockinger et al. 2005).

319 Importantly, males respond also to decapitated *D. simulans* females laced with Z4-  
320 11Al. This shows that a response to Z4-11Al does not require presence of the close-  
321 range CHC pheromone 7,11-HD, since 7,11-HD is not produced by *D. simulans* (Billeter  
322 et al. 2009, Lebreton et al. 2017, Billeter and Wolfner 2018, Sato and Yamamoto  
323 2020).

### 324 **Courtship discrimination between Or69a ligands**

325 Female pheromone Z4-11Al and the food odorant (*R*)-linalool are main ligands for  
326 Or69aB and Or69aA, which are co-expressed in ab9A OSNs, branching to the D  
327 glomerulus in the AL (Couto et al. 2005, Lebreton et al. 2017).

328 Whereas both compounds elicit innate flight attraction (Lebreton et al. 2017), males  
329 distinguish between Z4-11Al and (*R*)-linalool during courtship (Figure 2a,d), probably  
330 because males learn to associate Z4-11Al with females during mating. Courtship  
331 learning confirms production of Z4-11Al by females. The question arises whether males  
332 would even learn to associate (*R*)-linalool or other food-related compounds with  
333 females.

334 A differential response to Z4-11Al and (*R*)-linalool is reflected by their respective  
335 activation patterns in the AL (Figure 3a). (*R*)-linalool is also a ligand for Or98a, which  
336 accounts for stimulation of the VM5v glomerulus (Couto et al. 2005, Münch and Galizia  
337 2016)

338 In contrast, direct activation of DM2 and VM2 by Z4-11Al is not supported by SSR data  
339 (Lebreton et al. 2017) and lateral activation by local AL neurons is a possible explanation,  
340 instead (Wilson 2013). DM2 and VM2 are respond broadly, also to blends of vinegar and cVA  
341 (Lebreton et al. 2015).

342 Finally, we do not know whether the olfactory input of Or69aA and Or69aB through ab9A is  
343 entirely equivalent. OSN spiking trains generated by Or69aA and Or69aB may deliver non-  
344 congruent messages that may be distinguishable at the AL level. This is reminiscent of Or85e  
345 and Or33c which are coexpressed in ab3A OSNs, where it is yet unclear whether different  
346 response profiles and spiking patterns enable behavioural discrimination between the  
347 respective Or ligands (Goldman et al. 2005).

## 348 **Roles of cVA and Z4-11Al in upwind flight and courtship**

349 Male courtship in *D. melanogaster* has been anatomically and physiologically dissected  
350 at a neuronal circuit level, with a particular emphasis on the sex-dimorphic behavioural  
351 effect of cVA. A central node is the sexually dimorphic P1 interneuron cluster that  
352 integrates input from all sensory modalities to activate male courtship, and that is  
353 regulated by social experience. Male-produced pheromone cVA provides antagonistic  
354 olfactory input to the P1 node, preventing courtship of recently mated females  
355 perfumed with male cVA (Manoli et al. 2005, Stockinger et al. 2005, Kimura et al.  
356 2008, Ruta et al. 2010, Kohl et al. 2013, Yamamoto and Koganezawa 2013, Clowney et  
357 al. 2015, Kohl et al. 2015, Auer & Benton 2016).

358 cVA does not elicit long-range flight by itself, only in combination with fly food (Figure  
359 1; Bartelt et al. 1985, Lebreton et al. 2015) and is shared by many other *Drosophila*,  
360 including the sibling species *D. simulans* (Schaner et al. 1987, El-Sayed 2020).  
361 Females, on the other hand, produce the species-specific CHC 7,11-HD that feeds  
362 gustatory input into P1 to activate male courtship and to achieve reproductive isolation  
363 towards the sibling species *D. simulans* (Billeter et al. 2009, Thistle et al. 2012, Toda et  
364 al. 2012, Seeholzer et al. 2018). What is yet unclear is whether P1 also receives  
365 excitatory olfactory input.

366 Does Z4-11Al feed into P1? Z4-11Al encodes species-specificity, mediates long-range  
367 attraction (Figure 1; Lebreton et al. 2017) and contributes to courtship, independently  
368 of 7,11-HD (Figure 2a,b). Z4-11Al is perceived prior to and during upwind flight, and  
369 since females release Z4-11Al, it follows that stimulation is sustained at close-range.  
370 Courtship and upwind flight are not isolated episodes, they are inextricably  
371 interconnected parts of a behavioural sequence that culminates in copulation.

## 372 **A behavioural paradigm for bioactive odorant identification**

373 An unambiguous, stereotypical behavioural response is substrate for investigations of  
374 the genetic basis, neural circuitry and physiology of mate communication in *D.*  
375 *melanogaster*. We here show that upwind flight attraction is a behavioural paradigm  
376 that is suitable to extend investigations of reproductive behaviour to include long-range  
377 communication, and even decision-making upon odorant stimulation.

378 Comparison of pheromone blend attraction with vinegar and yeast shows that yeast  
379 overrides differences between pheromones (Figure 1). Vinegar, derived from acetic acid  
380 bacteria fermentation (Lynch et al. 2019), is a widely used standard food attractant for  
381 *D. melanogaster*, although live yeast aroma is much richer in composition (Callejón et  
382 al. 2009, Chinnici et al. 2009, Becher et al. 2010, Ljunggren et al. 2019). Yeast growing  
383 on ripe fruit is also a biologically more relevant attractant, since it attracts flies for  
384 oviposition and since yeast is a sufficient substrate for larval development (Becher et al.  
385 2012, Grangeteau et al. 2018, Quan and Eisen 2018, Murgier et al. 2019).

386 Reproductive behaviour in *D. melanogaster* is mediated by an ensemble of pheromones  
387 and food odorants, emanating from food substrates and from aggregating or mating  
388 flies. Our knowledge of *D. melanogaster* pheromone chemistry is fairly comprehensive,  
389 compared to behaviourally salient food odorants, owing to the extraordinary complexity  
390 of microbial headspace.

391 Flies recognize food sources despite very considerable, inherent variation in the  
392 bouquets emanating from fermenting fruit, according to fruit substrates, microbial  
393 community composition and fermentation state. Towards an understanding of how  
394 neural representations of such complex and variable odours are generated (Endo et al.  
395 2020) and how habitat cues are integrated with pheromonal signals we next need to  
396 identify the key odorants in microbial food headspace. An upwind flight bioassay is  
397 suitable to describe the key bioactive chemical constituents that encode reliable  
398 recognition and evaluation of food odour objects and trigger the decision to engage in  
399 orientation flights.

## 400 **Acknowledgements**

401 We thank two anonymous reviewers for constructive criticism.

## 402 **Competing interests**

403 No competing interests declared.

## 404 **Funding**

405 This study was supported by the Colombian Corporation for Agricultural Research  
406 (Corpoica), the Colombian Administrative Department of Science, Technology, and  
407 Innovation (Colciencias), the Linnaeus environment "Insect Chemical Ecology, Ethology  
408 and Evolution" IC-E3 (Formas, SLU, Sweden), and the Faculty of Landscape  
409 Architecture, Horticulture, and Crop Production Science (SLU, Alnarp, Sweden).

## 410 **Data availability**

411 Data will be made available at Dryad.

## 412      **References**

413      [70]

- 414      Alves, H., Rouault, J. D., Kondoh, Y., Nakano, Y., Yamamoto, D., Kim, Y. K., & Jallon, J.  
415              M. (2010). Evolution of cuticular hydrocarbons of Hawaiian *Drosophilidae*. *Behavior*  
416              *Genetics*, 40(5), 694-705. (doi:10.1007/s10519-010-9364-y)
- 417      Ando, Y., Yoshimizu, T., & Matsuo, T. (2020). Food availability reverses the effect of  
418              hunger state on copulation rate in *Drosophila prolongata* females. *Animal*  
419              *Behaviour*, 166, 51-59. (doi:10.1016/j.anbehav.2020.06.003)
- 420      Auer, T. O., & Benton, R. (2016). Sexual circuitry in *Drosophila*. *Current Opinion in*  
421              *Neurobiology* 38:18-26. (doi:10.1016/j.conb.2016.01.004)
- 422      Auer TO, Khallaf MA, Silbering AF, Zappia G, Ellis K, Alvarez-Ocana R, Arguello JR,  
423              Hansson BS, Jefferis GS, Caron SJ, Knaden M, Benton R. 2020. Olfactory receptor  
424              and circuit evolution promote host specialization. *Nature* 579:402-408.  
425              (doi:10.1038/s41586-020-2073-7)
- 426      Bartelt, R.J., Schaner, A.M. & Jackson, L.L. 1985 cis-Vaccenyl acetate as an aggregation  
427              pheromone in *Drosophila melanogaster*. *J. Chem. Ecol.* 11, 1747-1756.  
428              (doi:10.1007/BF01012124)
- 429      Bates AS, Schlegel P, Roberts RJV, Drummond N, Tamimi IFM, Turnbull R, Zhao X,  
430              Marin EC, Popovici PD, Dhawan S, Jamasb A, Javier A, Capdevila LS, Li F, Rubin  
431              GM, Waddell S, Bock DD, Costa M, Jefferis GSXE. 2020. Complete connectomic  
432              reconstruction of olfactory projection neurons in the fly brain. *Current Biology* 30,  
433              3183-3199. (doi.org/10.1016/j.cub.2020.06.042)
- 434      Becher PG, Bengtsson M, Hansson BS, Witzgall P. 2010. Flying the fly: long-range flight  
435              behavior of *Drosophila melanogaster* to attractive odors. *J chem Ecol* 36:599-607  
436              (doi: 10.1007/s10886-010-9794-2)
- 437      Becher, P.G., Flick, G., Rozpędowska, E., Schmidt, A., Hagman, A., Lebreton, S.,  
438              Larsson, M.C., Hansson, B.S., Piškur, J., Witzgall, P., et al. 2012 Yeast, not fruit  
439              volatiles mediate *Drosophila melanogaster* attraction, oviposition and development.  
440              *Funct. Ecol.* 26, 822-828. (doi:10.1111/j.1365-2435.2012.02006.x).
- 441      Billeter, J. C., Rideout, E. J., Dornan, A. J, Goodwin SF. Control of male sexual behavior  
442              in *Drosophila* by the sex determination pathway. *Curr. Biol.* 16, R766–R776 (2006).
- 443      Billeter JC, Atallah J, Krupp JJ, Millar JG, Levine JD. 2009. Specialized cells tag sexual  
444              and species identity in *Drosophila melanogaster*. *Nature* 461:987-U250  
445              (doi:10.1038/nature08495)
- 446      Billeter, J. C., & Wolfner, M. F. (2018). Chemical cues that guide female reproduction in  
447              *Drosophila melanogaster*. *Journal of chemical Ecology* 44:750-769.  
448              (doi:10.1007/s10886-018-0947-z)
- 449      Buser, C.C., Newcomb, R.D., Gaskett, A.C. & Goddard, M.R. 2014 Niche construction  
450              initiates the evolution of mutualistic interactions. *Ecol. Lett.* 17, 1257-1264.  
451              (doi:10.1111/ele.12331).
- 452      Cachero, S., Ostrovsky, A. D., Yu, J. Y., Dickson, B. J. & Jefferis, G. S. X. E. Sexual  
453              dimorphism in the fly brain. *Curr. Biol.* 20, 1589–1601 (2010).

- 454 Callejón, R.M., Tesfaye, W., Torija, M.J., Mas, A., Troncoso, A.M. and Morales, M.L.,  
455 2009. Volatile compounds in red wine vinegars obtained by submerged and surface  
456 acetification in different woods. *Food Chemistry*, 113(4), 1252-1259.  
457 (doi:10.1016/j.foodchem.2008.08.027)
- 458 Cazale-Debat, L., Houot, B., Farine, J. P., Everaerts, C., & Ferveur, J. F. (2019). Flying  
459 *Drosophila* show sex-specific attraction to fly-labelled food. *Scientific reports*, 9(1),  
460 1-13. (doi:10.1038/s41598-019-51351-1)
- 461 Chinnici, F., Duran Guerrero, E., Sonni, F., Natali, N., Natera Marin, R. and Riponi, C.,  
462 2009. Gas Chromatography– Mass Spectrometry (GC– MS) characterization of  
463 volatile compounds in quality vinegars with protected European geographical  
464 indication. *Journal of agricultural and food chemistry*, 57(11), 4784-4792.  
465 (doi:10.1021/jf804005w)
- 466 Christiaens, J.F., Franco, L.M., Cools, T.L., De Meester, L., Michiels, J., Wenseleers, T.,  
467 Hassan, B.A., Yaksi, E. & Verstrepen, K.J. 2014 The fungal aroma gene ATF1  
468 promotes dispersal of yeast cells through insect vectors. *Cell Reports* 9, 425-432.  
469 (doi:10.1016/j.celrep.2014.09.009).
- 470 Clowney, E.J., Iguchi, S., Bussell, J.J., Scheer, E. & Ruta, V. 2015 Multimodal  
471 Chemosensory Circuits Controlling Male Courtship in *Drosophila*. *Neuron* 87, 1036-  
472 1049. (doi:10.1016/j.neuron.2015.07.025).
- 473 Conceicao IC, Aguade M. 2008. High incidence of interchromosomal transpositions in  
474 the evolutionary history of a subset of Or genes in *Drosophila*. *J Molec Evol.*  
475 66:325-32. (doi:10.1007/s00239-008-9071-y)
- 476 Couto A, Alenius M, Dickson BJ. 2005. Molecular, anatomical, and functional  
477 organization of the *Drosophila* olfactory system. *Current Biology* 15:1535-1547  
478 (doi:10.1016/j.cub.2005.07.034)
- 479 Das S, Trona F, Khallaf MA, Schuh E, Knaden M, Hansson BS, Sachse S. 2017. Electrical  
480 synapses mediate synergism between pheromone and food odors in *Drosophila*  
481 *melanogaster*. *Proc Ntl Acad Sci USA* 114:E9962-E9971.  
482 (doi:10.1073/pnas.1712706114)
- 483 Davis, J. S., Percy, M. A., Yew, J. Y., & Moyle, L. C. (2020). A shift to shorter cuticular  
484 hydrocarbons causes sexual isolation in the *Drosophila americana* species group.  
485 bioRxiv (doi:10.1101/2020.09.07.286294)
- 486 De Oliveira, C. C., Manfrin, M. H., de M Sene, F., Jackson, L. L., & Etges, W. J. 2011.  
487 Variations on a theme: diversification of cuticular hydrocarbons in a clade of  
488 cactophilic *Drosophila*. *BMC Evolutionary Biology* 11:179. (doi:10.1186/1471-2148-  
489 11-179)
- 490 Dekker, T., Ibba, I., Siju, K. P., Stensmyr, M. C., & Hansson, B. S. (2006). Olfactory  
491 shifts parallel superspecialism for toxic fruit in *Drosophila melanogaster* sibling, *D.*  
492 *sechellia*. *Current Biology* 16:101-109. (doi:10.1016/j.cub.2005.11.075)
- 493 Depetris-Chauvin, A., Galagovsky, D. & Grosjean, Y. 2015 Chemicals and  
494 chemoreceptors: ecologically relevant signals driving behavior in *Drosophila*. *Front*  
495 *Ecol Evol* 3. (doi:10.3389/fevo.2015.00041).
- 496 Ejima A, Smith BPC, Lucas C, Van Naters WV, Miller CJ, Carlson JR, Levine JD, Griffith  
497 LC. 2007. Generalization of courtship learning in *Drosophila* is mediated by cis-  
498 vaccenyl acetate. *Curr Biol* 17:599-605. (doi:10.1016/j.cub.2007.01.053)



- 499 El-Sayed, A. M. (2020). The pherobase: database of pheromones and semiochemicals.  
500 [www.pherobase.com](http://www.pherobase.com)
- 501 Endo K, Tsuchimoto Y, Kazama H. 2020. Synthesis of conserved odor object  
502 representations in a random, divergent-convergent network. *Neuron* 108, 367–  
503 381. (doi:10.1016/j.neuron.2020.07.029)
- 504 Goldman, A. L., van Naters, W. V. D. G., Lessing, D., Warr, C. G., & Carlson, J. R.  
505 (2005). Coexpression of two functional odor receptors in one neuron. *Neuron*  
506 45:661-666. (doi:10.1016/j.neuron.2005.01.025)
- 507 Gorter, J.A., Jagadeesh, S., Gahr, C., Boonekamp, J.J., Levine, J.D. and Billeter, J.C.,  
508 2016. The nutritional and hedonic value of food modulate sexual receptivity in  
509 *Drosophila melanogaster* females. *Scientific reports*, 6, 19441  
510 (doi:10.1038/srep19441)
- 511 Grabe, V., Strutz, A., Baschwitz, A., Hansson, B.S. and Sachse, S., 2015. Digital in vivo  
512 3D atlas of the antennal lobe of *Drosophila melanogaster*. *Journal of Comparative*  
513 *Neurology*, 523(3), pp.530-544 (doi:10.1002/cne.23697).
- 514 Grabe, V., Baschwitz, A., Dweck, H.K., Lavista-Llanos, S., Hansson, B.S. and Sachse,  
515 S., 2016. Elucidating the neuronal architecture of olfactory glomeruli in the  
516 *Drosophila* antennal lobe. *Cell Reports*, 16(12), pp.3401-3413.  
517 (doi:10.1016/j.celrep.2016.08.063)
- 518 Grangeteau, C., Yahou, F., Everaerts, C., Dupont, S., Farine, J.P., Beney, L. and  
519 Ferveur, J.F. 2018. Yeast quality in juvenile diet affects *Drosophila melanogaster*  
520 adult life traits. *Scientific Reports* 8, 1-9. (doi:10.1038/s41598-018-31561-9)
- 521 Grosjean Y, Rytz R, Farine JP, Abuin L, Cortot J, Jefferis GSXE, Benton R. 2011. An  
522 olfactory receptor for food-derived odours promotes male courtship in *Drosophila*.  
523 *Nature* 478:236-U123. (doi: 10.1038/nature10428)
- 524 Howard, R.W., Jackson, L.L., Banse, H. and Blows, M.W., 2003. Cuticular hydrocarbons  
525 of *Drosophila birchii* and *D. serrata*: identification and role in mate choice in *D.*  
526 *serrata*. *Journal of Chemical Ecology* 29(4):961-976.  
527 (doi:10.1023/A:1022992002239)
- 528 Keleman, K., Vrontou, E., Krüttner, S., Jai, Y. Y., Kurtovic-Kozaric, A., & Dickson, B. J.  
529 (2012). Dopamine neurons modulate pheromone responses in *Drosophila* courtship  
530 learning. *Nature* 489:145-149. (doi:10.1038/nature11345)
- 531 Khallaf MA, Auer TO, Grabe V, Depetris-Chauvin A, Ammagarahalli B, Zhang D-D,  
532 Lavista-Llanos S, Kaftan F, Weißflog J, Matzkin LM, Rollmann SM, Löfstedt C,  
533 Svatos A, Dweck HKM, Sachse S, Benton R, Hansson BS, Knaden M. 2020a. Mate  
534 discrimination among subspecies through a conserved olfactory pathway. *Sci. Adv.*  
535 6: eaba5279. (doi:10.1126/sciadv.aba5279)
- 536 Khallaf, M.A., Cui, R., Weißflog, J., Svatoš, A., Dweck, H., Valenzano, D.R., Hansson,  
537 B.S. and Knaden, M., 2020b. Large-scale characterization of sex pheromone  
538 communication systems in *Drosophila*. *bioRxiv*, September 22  
539 (doi:10.1101/2020.09.21.305854)
- 540 Kimura, K., Hachiya, T., Koganezawa, M., Tazawa, T., Yamamoto, D. 2008. Fruitless  
541 and Doublesex coordinate to generate male-specific neurons that can courtship.  
542 *Neuron* 59, 759-769. (doi:10.1038/nrn3567)



- 543 Kohl, J., Ostrovsky, Aaron D., Frechter, S. & Jefferis, Gregory S. 2013 A Bidirectional  
544 Circuit Switch Reroutes Pheromone Signals in Male and Female Brains. *Cell* 155,  
545 1610-1623. (doi:10.1016/j.cell.2013.11.025).
- 546 Kohl J, Huoviala P, Jefferis GSXE. 2015. Pheromone processing in *Drosophila*. *Curr Op*  
547 *Neurobiol* 34:149-157. (doi:10.1016/j.conb.2015.06.009)
- 548 Kurtovic A, Widmer A, Dickson BJ. 2007. A single class of olfactory neurons mediates  
549 behavioural responses to a *Drosophila* sex pheromone. *Nature* 446:542-546.  
550 (doi:10.1038/nature05672).
- 551 Larsson, M. C., Domingos, A. I., Jones, W. D., Chiappe, M. E., Amrein, H., & Vosshall,  
552 L. B. (2004). Or83b encodes a broadly expressed odorant receptor essential for  
553 *Drosophila* olfaction. *Neuron* 43:703-714.(doi:10.1016/j.neuron.2004.08.019)
- 554 Lebreton S, Grabe V, Omondi AB, Ignell R, Becher PG, Hansson BS, Sachse S, Witzgall  
555 P. 2014. Love makes smell blind: mating suppresses pheromone attraction in  
556 *Drosophila* females via OR65a olfactory neurons. *Sci Rep* 4:7119  
557 (doi:10.1038/srep07119)
- 558 Lebreton S, Trona S, Borrero-Echeverry F, Bilz F, Grabe V, Becher PG, Carlsson MA,  
559 Nässel DR, Hansson BS, Sachse S, Witzgall P. 2015. Feeding regulates sex  
560 pheromone attraction and courtship in *Drosophila* females. *Sci Rep* 5:13132  
561 (doi:10.1038/srep13132)
- 562 Lebreton, S., Borrero-Echeverry, F., Gonzalez, F., Solum, M., Wallin, E.A., Hedenström,  
563 E., Hansson, B.S., Gustavsson, A.-L., Bengtsson, M., Birgersson, G., et al. 2017 A  
564 *Drosophila* female pheromone elicits species-specific long-range attraction via an  
565 olfactory channel with dual specificity for sex and food. *BMC Biol.* 15, 88.  
566 (doi:10.1186/s12915-017-0427-x).
- 567 Legendre, A., Miao, X. X., Da Lage, J. L., & Wicker-Thomas, C. (2008). Evolution of a  
568 desaturase involved in female pheromonal cuticular hydrocarbon biosynthesis and  
569 courtship behavior in *Drosophila*. *Insect biochemistry and molecular biology*, 38(2),  
570 244-255. (doi:10.1016/j.ibmb.2007.11.005)
- 571 Ljunggren J, Borrero-Echeverry F, Chakraborty A, Lindblom TU, Hedenström E, Karlsson  
572 M, Witzgall P, Bengtsson M. 2019. Yeast volatomes differentially effect larval  
573 feeding in an insect herbivore. *Appl Environm Microbiol* 85: e01761-19  
574 (doi:10.1128/AEM.01761-19)
- 575 Lynch, K.M., Zannini, E., Wilkinson, S., Daenen, L. and Arendt, E.K., 2019. Physiology  
576 of acetic acid bacteria and their role in vinegar and fermented beverages.  
577 *Comprehensive Reviews in Food Science and Food Safety*, 18, 587-625.  
578 (doi:10.1111/1541-4337.12440)
- 579 Manoli, D. S., Foss, M., Vilella, A., Taylor, B. J., Hall, J. C., & Baker, B. S. 2005. Male-  
580 specific fruitless specifies the neural substrates of *Drosophila* courtship behaviour.  
581 *Nature* 436:395-400. (doi:10.1038/nature03859)
- 582 Markow, T. A. (2019). Host use and host shifts in *Drosophila*. *Current Opinion in Insect*  
583 *Science* 31:139-145.(doi:10.1016/j.cois.2019.01.006)
- 584 Merico, A., Sulo, P., Piskur, J. & Compagno, C. (2007) Fermentative lifestyle in yeasts  
585 belonging to the *Saccharomyces* complex. *FEBS Journal*, 274, 976-989.  
586 (doi:10.1111/j.1742-4658.2007.05645.x)

- 587 Münch D, Galizia CG. 2016. DoOR 2.0 - Comprehensive mapping of *Drosophila*  
588 *melanogaster* odorant responses. Scientific Reports 6:21841  
589 (doi:10.1038/srep21841)
- 590 Murgier, J., Everaerts, C., Farine, J.P. and Ferveur, J.F., 2019. Live yeast in juvenile  
591 diet induces species-specific effects on *Drosophila* adult behaviour and fitness.  
592 Scientific Reports 9,1-12. (doi:10.1038/s41598-019-45140-z)
- 593 Nakai, J., Ohkura, M., & Imoto, K. (2001). A high signal-to-noise Ca<sup>2+</sup> probe composed  
594 of a single green fluorescent protein. Nature Biotechnology 19:137-  
595 141.(doi:10.1038/84397)
- 596 Quan AS, Eisen MB (2018) The ecology of the *Drosophila*-yeast mutualism in wineries.  
597 PLoS One 13(5): e0196440. (doi:10.1371/journal.pone.0196440)
- 598 R Core Team. 2013 R: A Language and Environment for Statistical Computing. Vienna,  
599 Austria, R Foundation for Statistical Computing.
- 600 Robertson HM, Warr CG, Carlson JR. 2003. Molecular evolution of the insect  
601 chemoreceptor gene superfamily in *Drosophila melanogaster*. Proc Natl Acad Sci  
602 USA 100:14537-42. (doi:10.1073/pnas.233584710)
- 603 Ruebenbauer, A., Schlyter, F., Hansson, B.S., Löfstedt, C., Larsson, M.C. 2008. Genetic  
604 variability and robustness of host odor preference in *Drosophila melanogaster*.  
605 Curr. Biol. 18: 1438-1443. (doi:10.1016/j.cub.2008.08.062)
- 606 Ruta V, Datta SR, Vasconcelos ML, Freeland J, Looger LL, Axel R. 2010. A dimorphic  
607 pheromone circuit in *Drosophila* from sensory input to descending output. Nature  
608 2010, 468:686-690. (doi:10.1038/nature09554)
- 609 Sato K and Yamamoto D (2020) Contact-chemosensory evolution underlying  
610 reproductive isolation in *Drosophila* species. Front. Behav. Neurosci. 14:597428.  
611 (10.3389/fnbeh.2020.597428)
- 612 Schaner, A.M., Bartelt, R.J. & Jackson, L.L. 1987. (Z)-11-octadecenyl acetate, an  
613 aggregation pheromone in *Drosophila simulans*. J Chem Ecol 13, 1777-1786  
614 (doi:10.1007/BF00980218)
- 615 Seeholzer, L. F., Seppo, M., Stern, D. L., & Ruta, V. (2018). Evolution of a central  
616 neural circuit underlies *Drosophila* mate preferences. Nature, 559(7715), 564-569.  
617 (doi:10.1038/s41586-018-0322-9)
- 618 Stockinger P, Kvitsiani D, Rotkopf S, Tirian L, Dickson BJ. 2005. Neural circuitry that  
619 governs *Drosophila* male courtship behavior. Cell 121:795-807  
620 (doi:10.1016/j.cell.2005.04.026).
- 621 Strutz, A., Soelter, J., Baschwitz, A., Farhan, A., Grabe, V., Rybak, J., Knaden M,  
622 Schmuker M, Hansson BS, Sachse, S. (2014). Decoding odor quality and intensity  
623 in the *Drosophila* brain. Elife, 3, e04147. (doi:10.7554/eLife.04147)
- 624 Thistle, R., Cameron, P., Ghorayshi, A., Dennison, L., & Scott, K. (2012). Contact  
625 chemoreceptors mediate male-male repulsion and male-female attraction during  
626 *Drosophila* courtship. Cell, 149(5), 1140-1151. (doi:10.1016/j.cell.2012.03.045)
- 627 Toda, H., Zhao, X., & Dickson, B. J. (2012). The *Drosophila* female aphrodisiac  
628 pheromone activates ppk23<sup>+</sup> sensory neurons to elicit male courtship behavior.  
629 Cell Reports 1:599-607. (doi:10.1016/j.celrep.2012.05.007)

- 630 Vosshall, L. B., & Stocker, R. F. (2007). Molecular architecture of smell and taste in  
631 *Drosophila*. *Annu. Rev. Neurosci.* 30:505-533.  
632 (doi:10.1146/annurev.neuro.30.051606.094306)
- 633 Wilson RI. 2013. Early olfactory processing in *Drosophila*: mechanisms and principles.  
634 *Annu Rev Neurosci* 36:217-241 (doi:10.1146/annurev-neuro-062111-150533)
- 635 Yamamoto, D., & Koganezawa, M. (2013). Genes and circuits of courtship behaviour in  
636 *Drosophila* males. *Nature Reviews Neuroscience* 14:681-692.  
637 (doi:10.1038/nrn3567)

## 638 **Figure legends**

### 639 **Figure 1**

640 Odour-mediated upwind flight attraction of fruit fly *Drosophila melanogaster* males  
641 (blue bars) and females (ochre bars) to (a) vinegar and yeast headspace, (b) 10  
642 ng/min male sex pheromone cVA, (c) 10 ng/min female sex pheromone Z4-11Al, alone  
643 and in blends with vinegar or yeast headspace, respectively. Letters of the  
644 corresponding colours show differences between treatments using Wald pairwise  
645 comparisons. Asterisks show treatments with significant differences between sexes  
646 ( $n=40$ ).

### 647 **Figure 2**

648 Effect of Z4-11Al on courtship in *D. melanogaster* males. Decapitated target flies were  
649 painted with 1 ng test compound or heptane (solvent control). The number of courting  
650 and non-courting males in each test was compared using a chi-square test, asterisks  
651 show significant differences.  
652

653 (a) Proportion of unmated or mated *D. melanogaster* (Dalby) test males courting  
654 unmated decapitated female or male target flies treated with 1 ng Z4-11Al or heptane  
655 (solvent control) ( $n=80$ ,  $P=0.006$  and  $P=0.007$ ).

656 (b) Proportion of mated Canton-S and Dalby strain *D. melanogaster* males and *D.*  
657 *simulans* males, courting decapitated Dalby or *D. simulans* females, treated with 1 ng  
658 Z4-11Al or heptane ( $n=80$ ,  $P=0.009$  and  $P=0.039$ ).

659 (c) Effect of RNA interference, in Orco-Gal4/uas-Or69aRNAi mated males, courting  
660 Dalby target females, treated with 1 ng Z4-11Al or heptane. Parental lines, Orco-Gal4  
661 and uas-Or69aRNAi, show significant courtship behaviour ( $n=80$ ,  $P=0.036$  and  
662  $P=0.032$ ).

663 (d) Proportion of mated Dalby males courting decapitated Dalby females, treated with  
664 E4-11Al, (R)-linalool or ethyl butyrate ( $n=80$ ).

665 **Figure 3**

666 Calcium imaging responses in the antennal lobe (AL). Colours show the median  
667 normalized calcium activity ( $\Delta F/F$  [%]) in response to controls and odor applications,  
668 according to the colour bar on the left ( $n=10$ ; mean $\pm$ SD).

669 (a) Calcium activity in Orco-Gal4 males (top) and females (below) in response to  
670 control (air, mineral oil), to 60 and 600 ng Z4-11Al, and to 600 ng (*R*)-linalool. Z4-11Al  
671 and (*R*)-linalool are key ligands for the D glomerulus (Lebreton et al. 2017).

672 (b) Responses of Or22a-Gal4 males to Z4-11Al in the DM2 glomerulus and of Or43b-  
673 Gal4 males in the DM5 and VM2 glomeruli; ethyl butyrate is a diagnostic stimulus for  
674 these glomeruli.

675 (c) Projection neuron (PN) responses in GH146-Gal4 males to Z4-11Al and (*R*)-linalool  
676 in D and DM2 glomeruli.

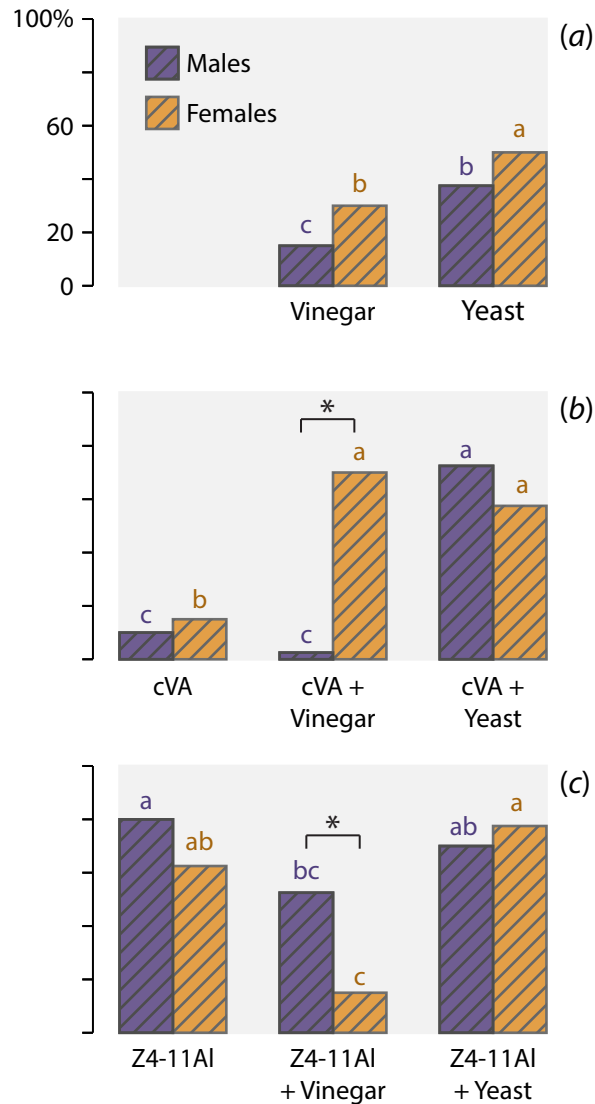

**Figure 1.** Odour-mediated upwind flight attraction of fruit fly *Drosophila melanogaster* males (blue bars) and females (ochre bars) to (a) vinegar and yeast headspace, (b) 10 ng/min male sex pheromone cVA, (c) 10 ng/min female sex pheromone Z4-11AI, alone and in blends with vinegar or yeast headspace, respectively. Letters of the corresponding colours show differences between treatments using Wald pairwise comparisons. Asterisks show treatments with significant differences between sexes (n=40).

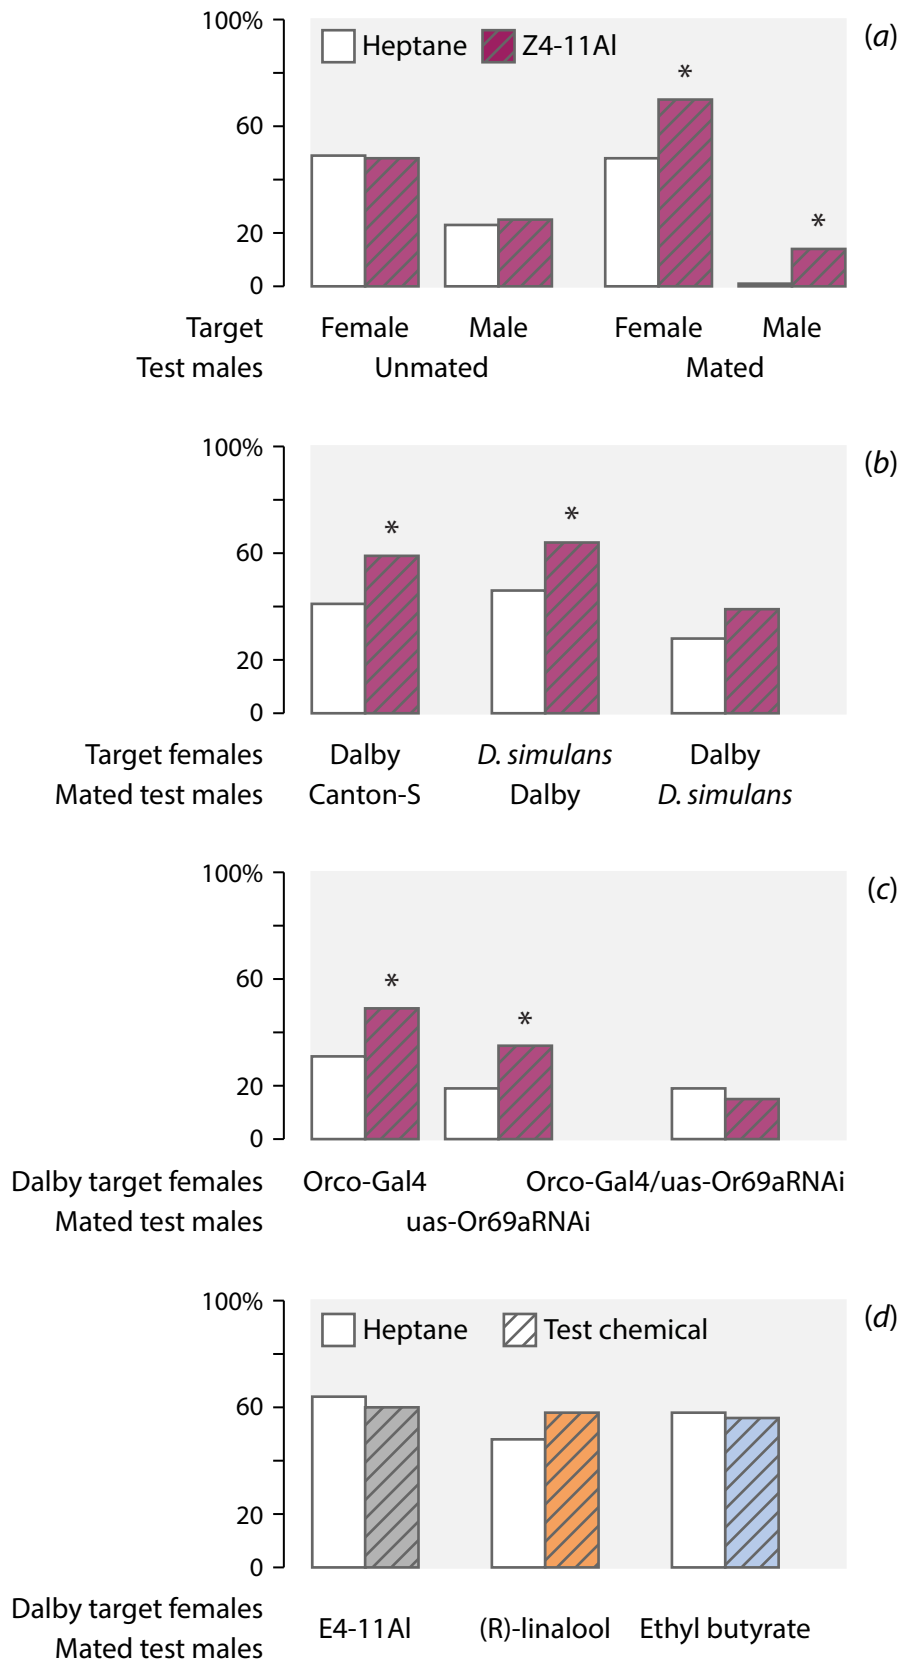

**Figure 2.** Effect of Z4-11Al on courtship in *D. melanogaster* males. Decapitated target flies were painted with 1 ng test compound or heptane (solvent control). The number of courting and non-courting males in each test was compared using a chi-square test, asterisks show significant differences.

(a) Proportion of unmated or mated *D. melanogaster* (Dalby) test males courting unmated decapitated female or male target flies treated with 1 ng Z4-11Al or heptane (solvent control) (n=80, P=0.006 and P=0.007).

(b) Proportion of mated Canton-S and Dalby strain *D. melanogaster* males and *D. simulans* males, courting decapitated Dalby or *D. simulans* females, treated with 1 ng Z4-11Al or heptane (n=80, P=0.009 and P=0.039).

(c) Effect of RNA interference, in Orco-Gal4/uas-Or69aRNAi mated males, courting Dalby target females, treated with 1 ng Z4-11Al or heptane. Parental lines, Orco-Gal4 and uas-Or69aRNAi, show significant courtship behaviour (n=80, P=0.036 and P=0.032).

(d) Proportion of mated Dalby males courting decapitated Dalby females, treated with E4-11Al, (R)-linalool or ethyl butyrate (n=80).

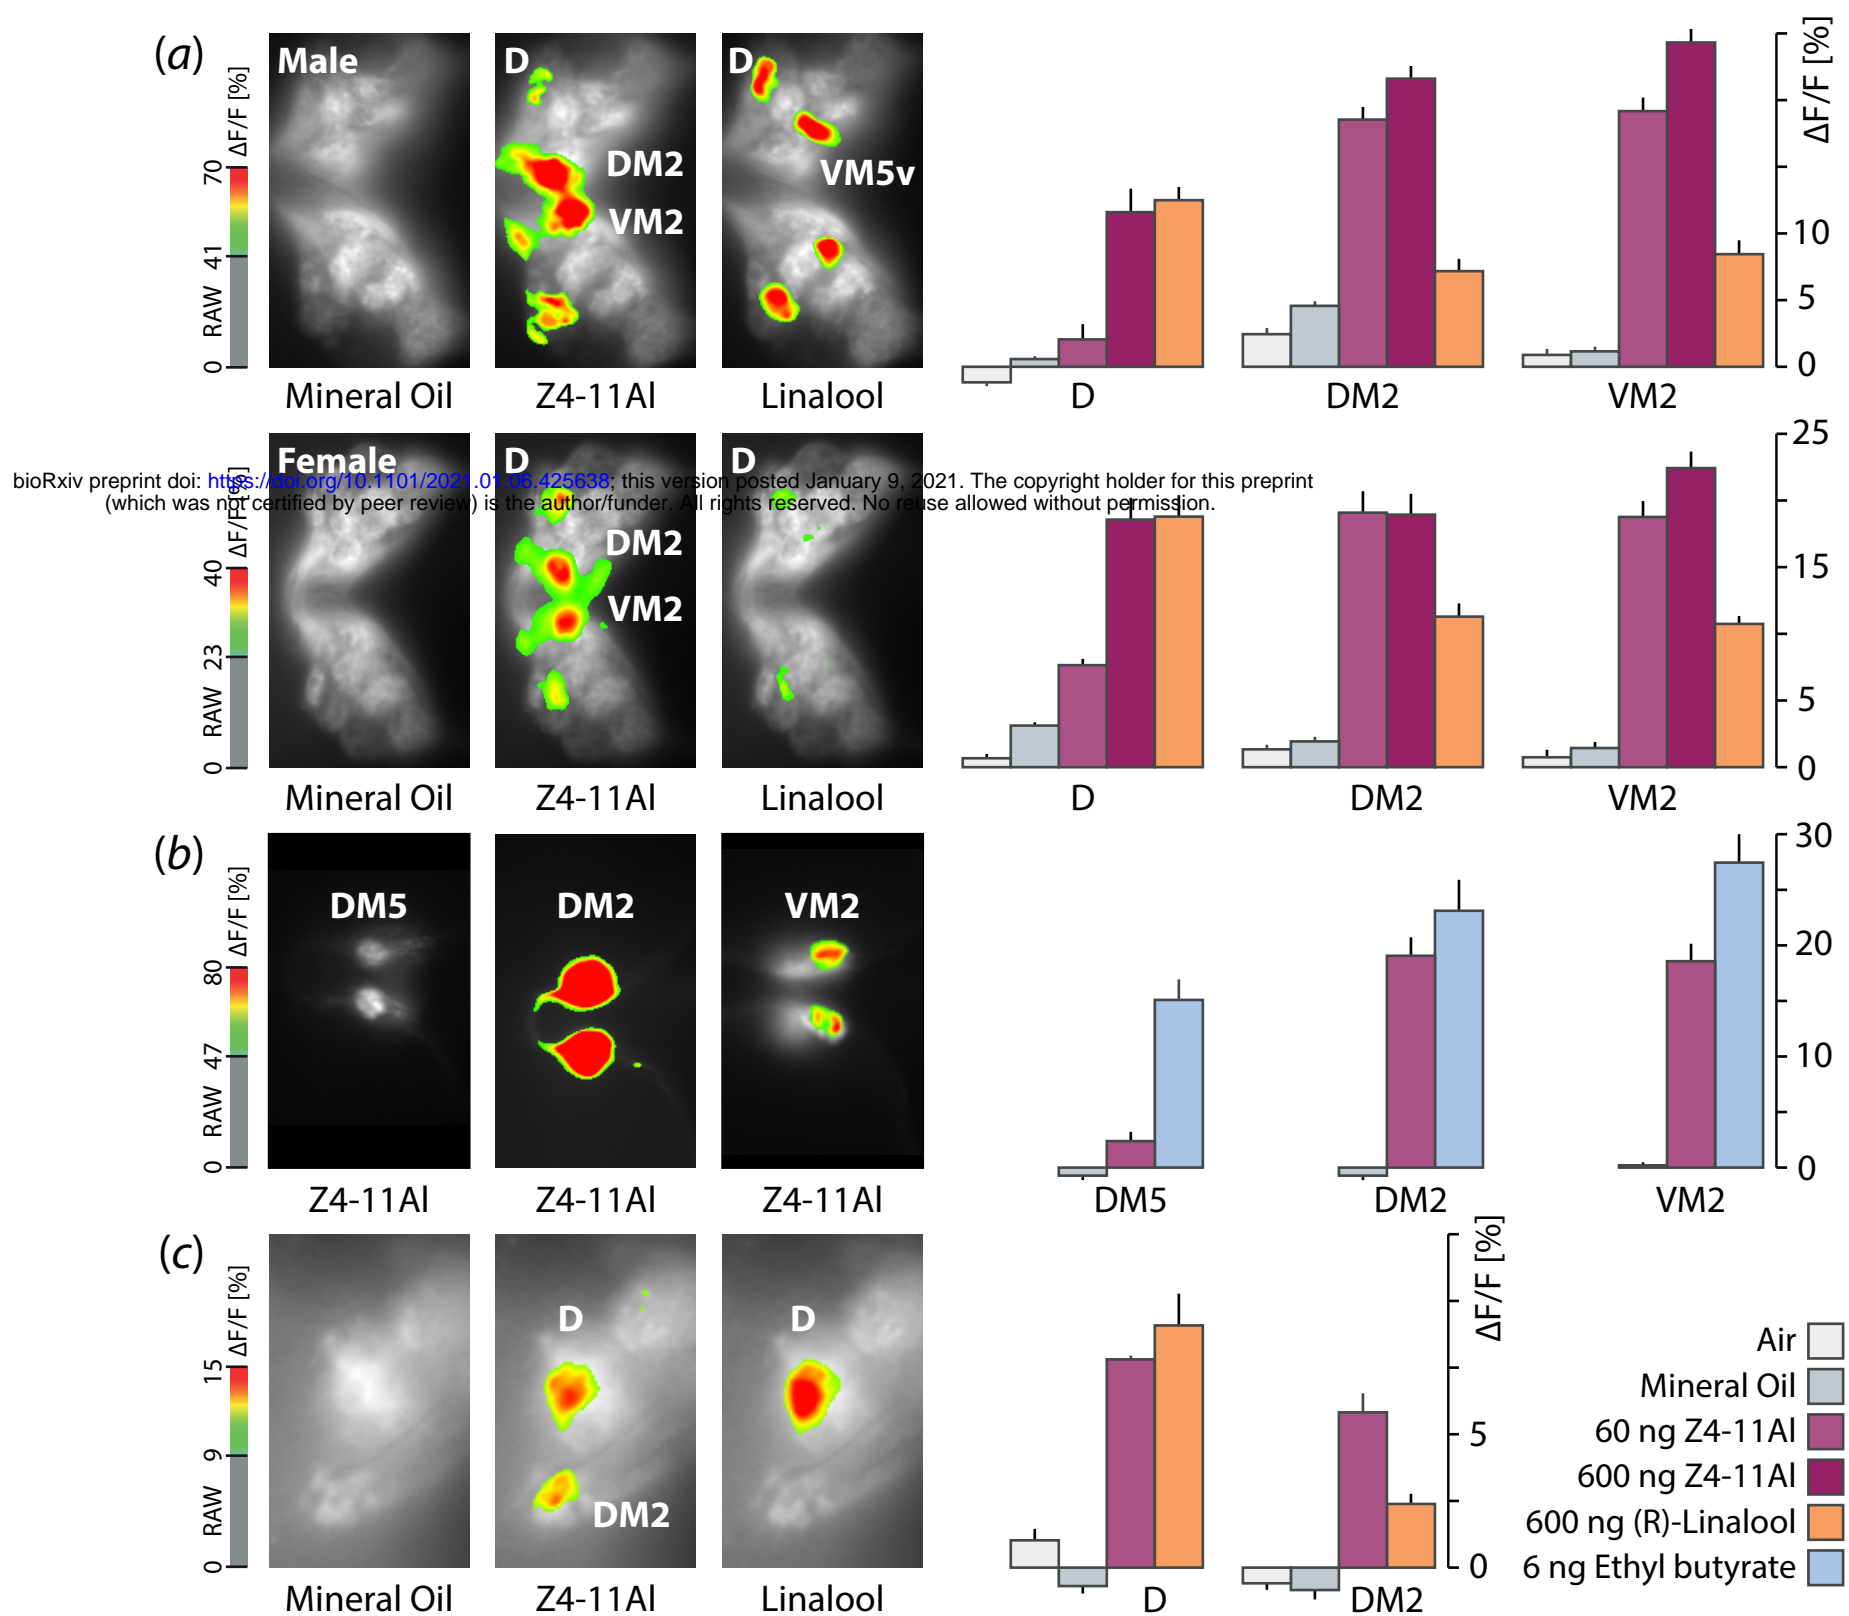

**Figure 3.** Calcium imaging responses in the antennal lobe (AL). Colours show the median normalized calcium activity ( $\Delta F/F$  [%]) in response to controls and odor applications, according to the colour bar on the left ( $n=10$ ; mean $\pm$ SD).

(a) Calcium activity in Orco-Gal4 males (top) and females (below) in response to control (air, mineral oil), to 60 and 600 ng Z4-11Al, and to 600 ng (R)-linalool. Z4-11Al and (R)-linalool are key ligands for the D glomerulus (Lebreton et al. 2017).

(b) Responses of Or22a-Gal4 males to Z4-11Al in the DM2 glomerulus and of Or43b-Gal4 males in the DM5 and VM2 glomeruli; ethyl butyrate is a diagnostic stimulus for these glomeruli.

(c) Projection neuron (PN) responses in GH146-Gal4 males to Z4-11Al and (R)-linalool in D and DM2 glomeruli.
